# Supplementary material for: Causal Relationship Between Immune Cells and Female Infertility: A Mendelian Randomisation Study
Source: Research Square preprint supplement (doi:10.21203/rs.3.rs-4007697/v1), 2024-03-13
Supplement: Supplementary file 1 [file 670cd802edbddf26ed648ae4.pdf]

Supplementary Figure 1 Causal associations between immune cells and female infertility.

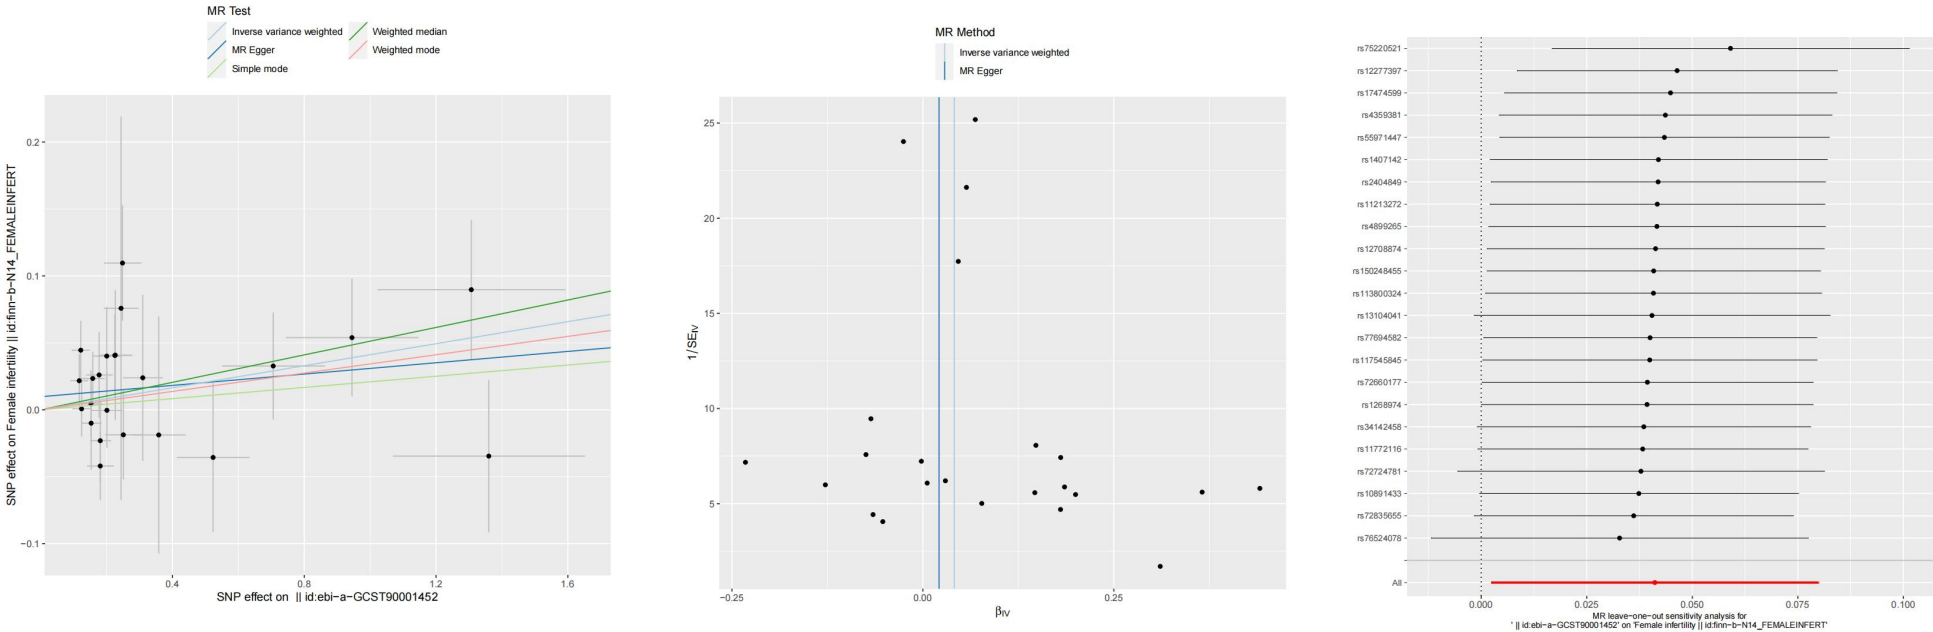

(A) Scatter plots, funnel plots, and sensitivity analyses of CD11c+ CD62L- monocyte AC and female infertility risk

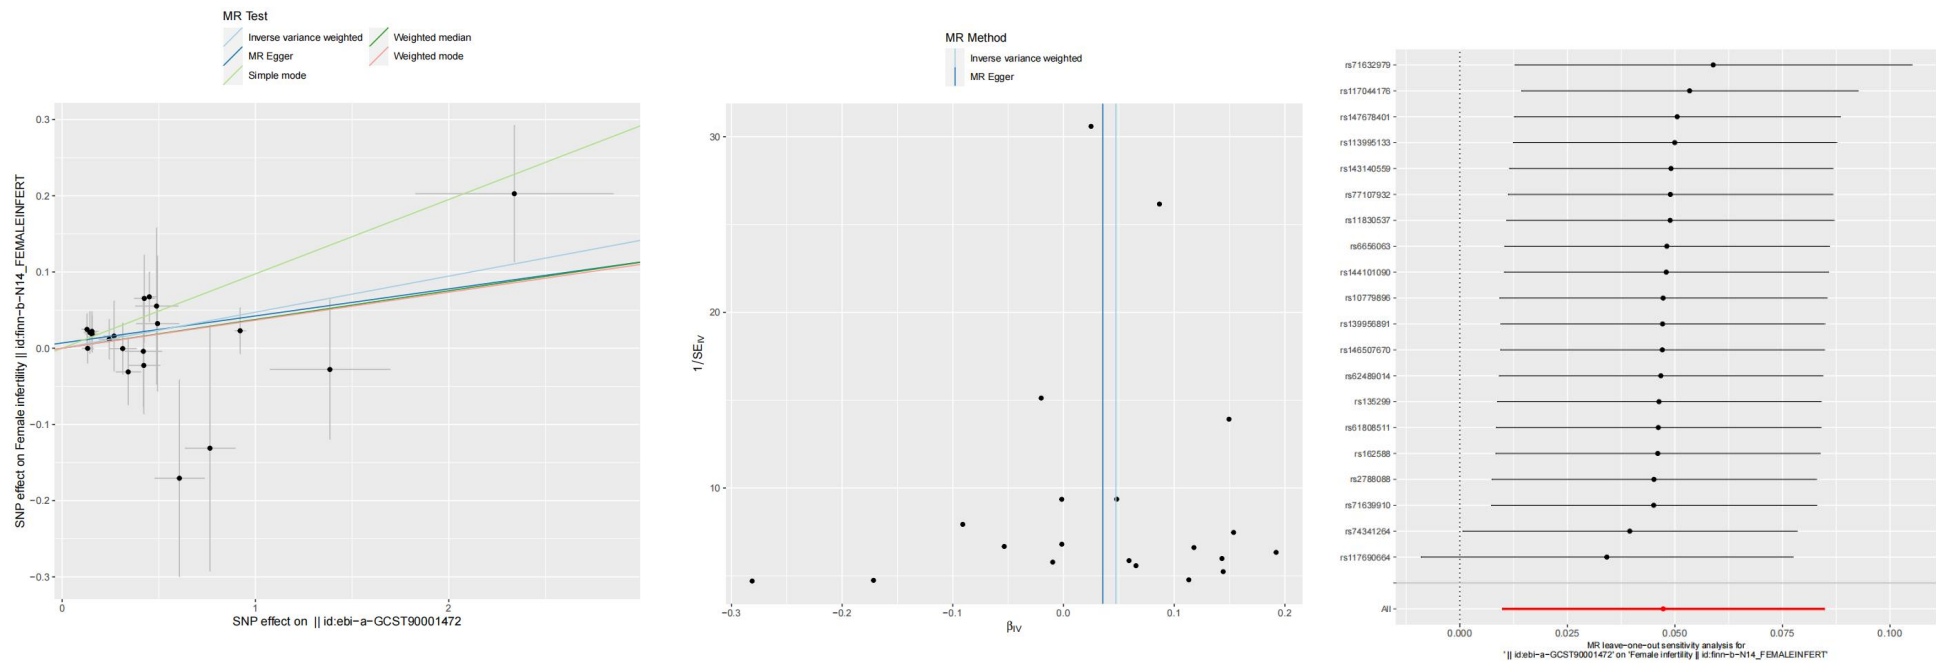

(B) Scatter plots, funnel plots, and sensitivity analyses of CD62L- CD86+ myeloid DC AC and female infertility risk

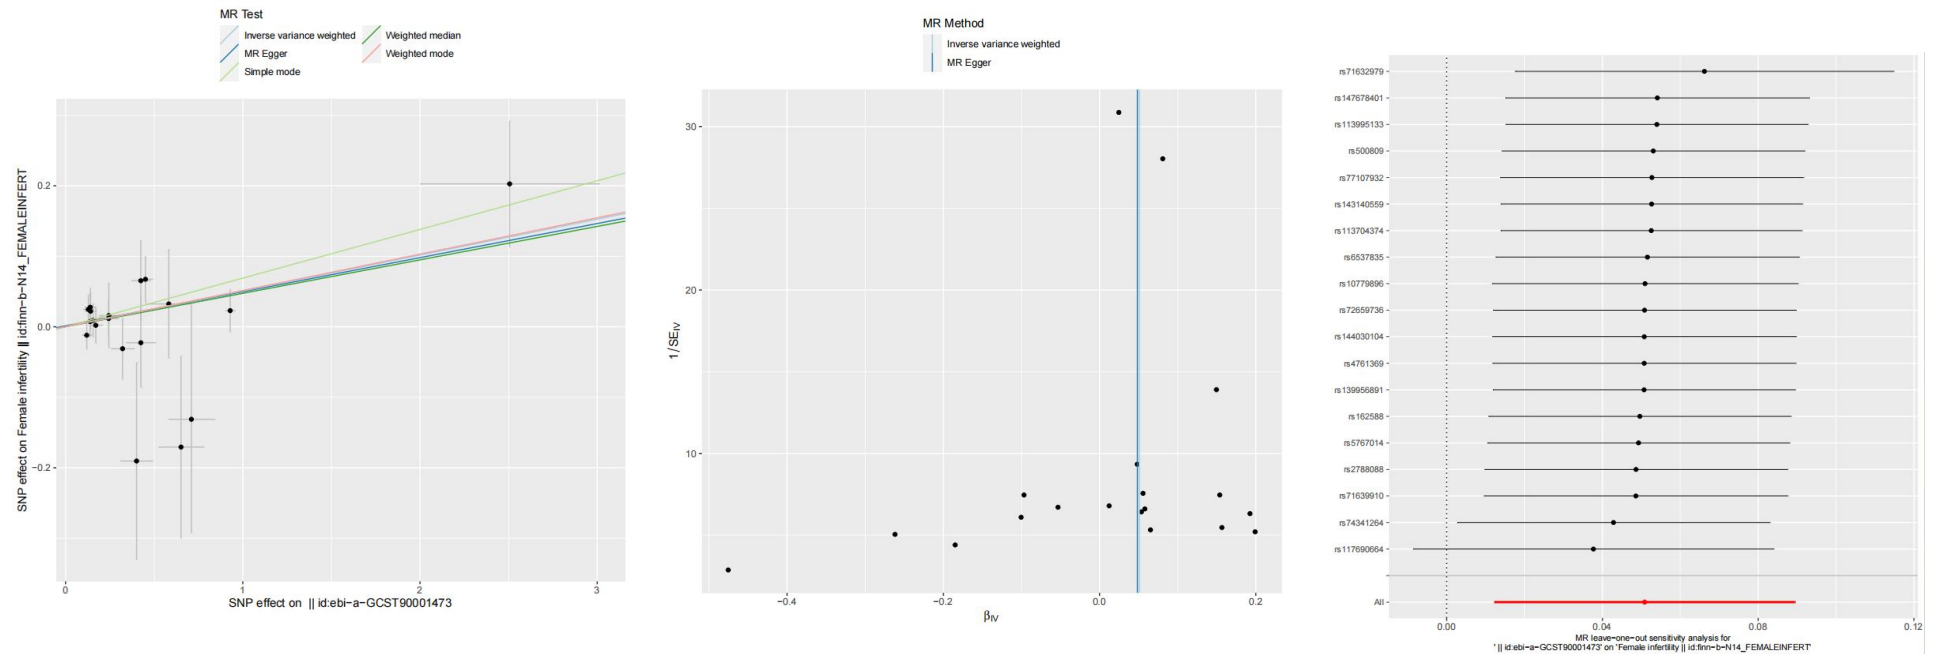

(C) Scatter plots, funnel plots, and sensitivity analyses of CD62L- CD86+ myeloid DC %DC and female infertility risk

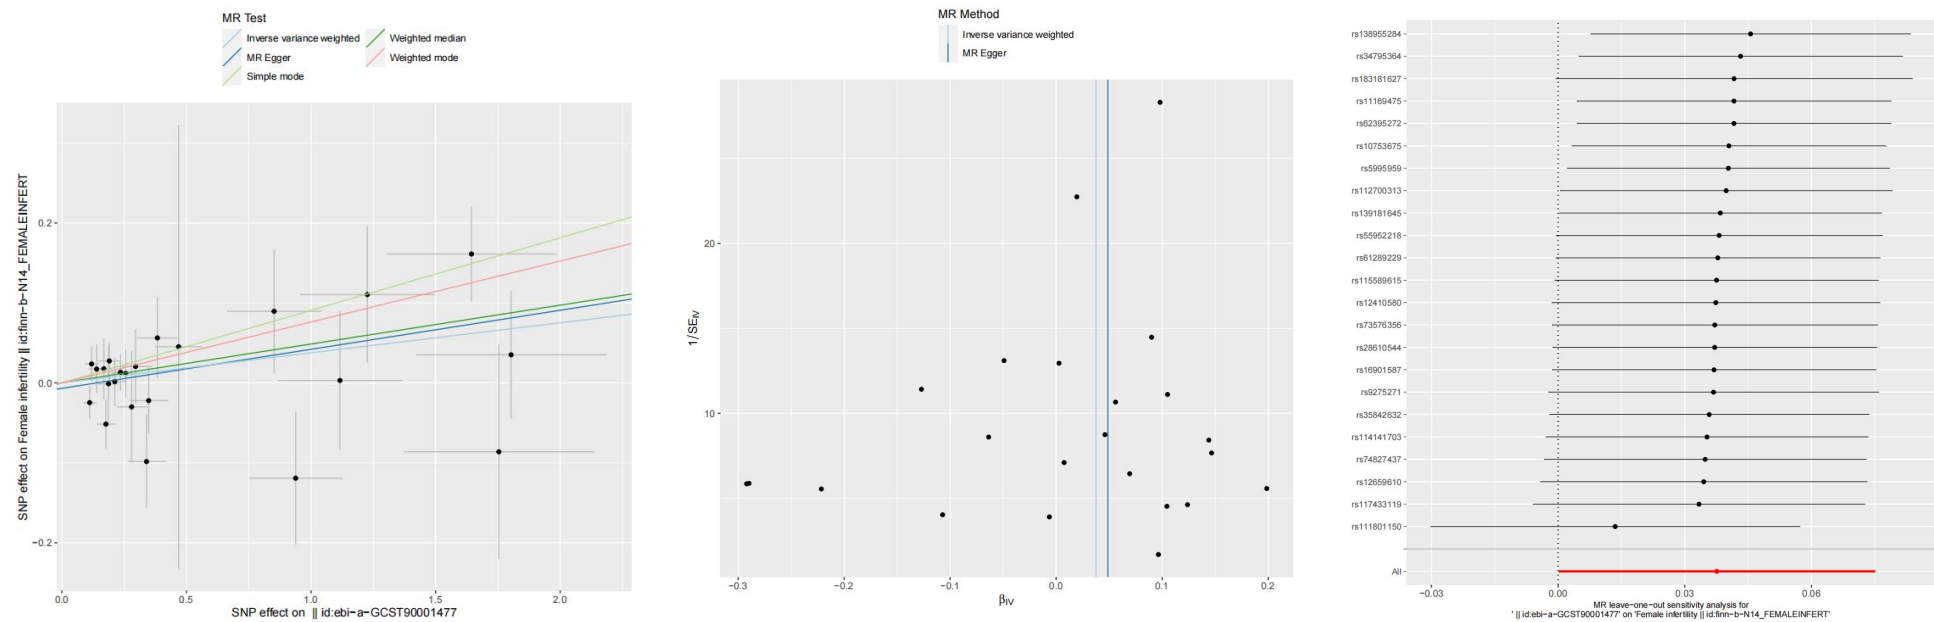

(D) Scatter plots, funnel plots, and sensitivity analyses of HLA DR++ monocyte AC and female infertility risk

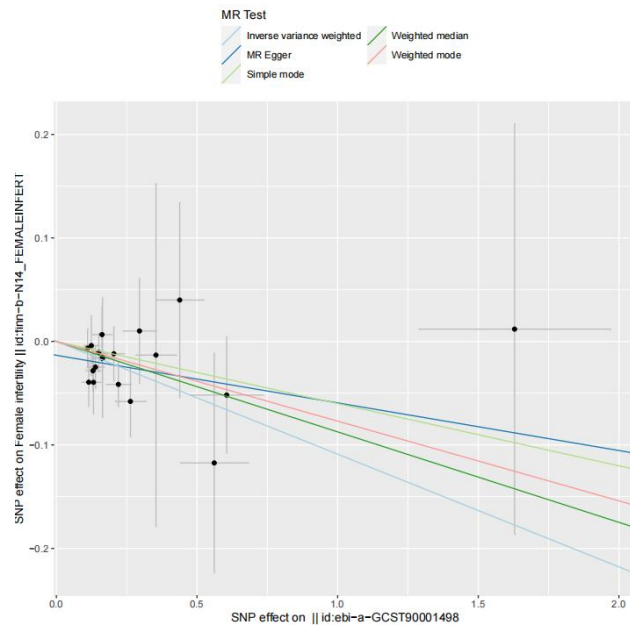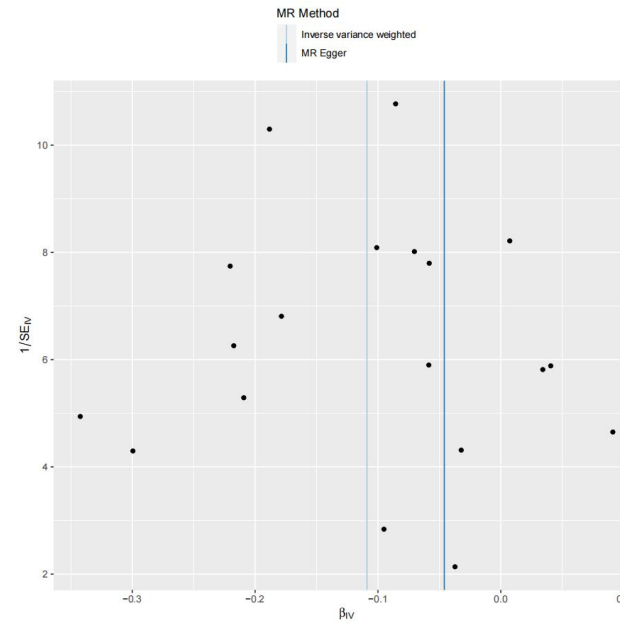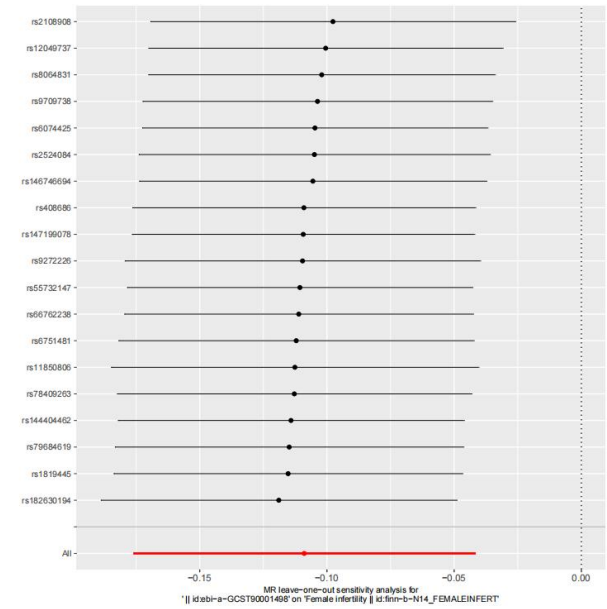

(E) Scatter plots, funnel plots, and sensitivity analyses of Activated & resting Treg AC and female infertility risk

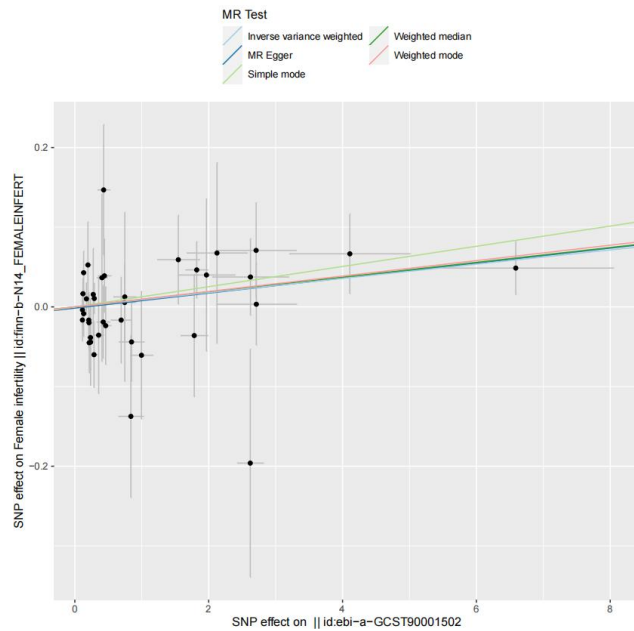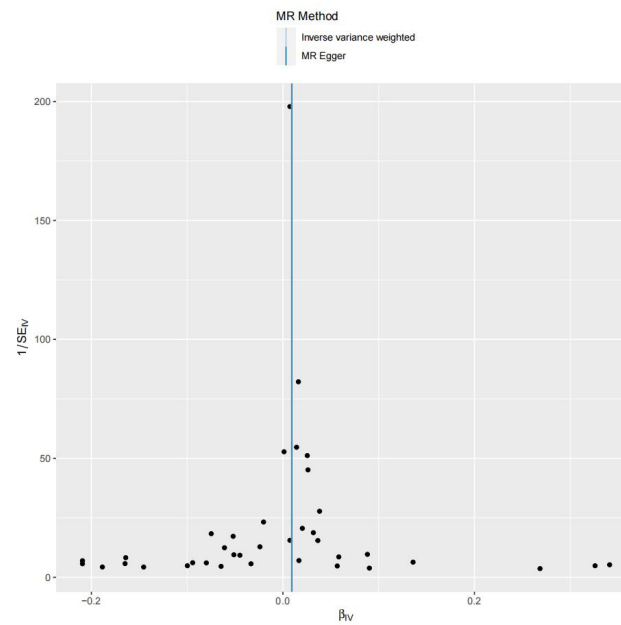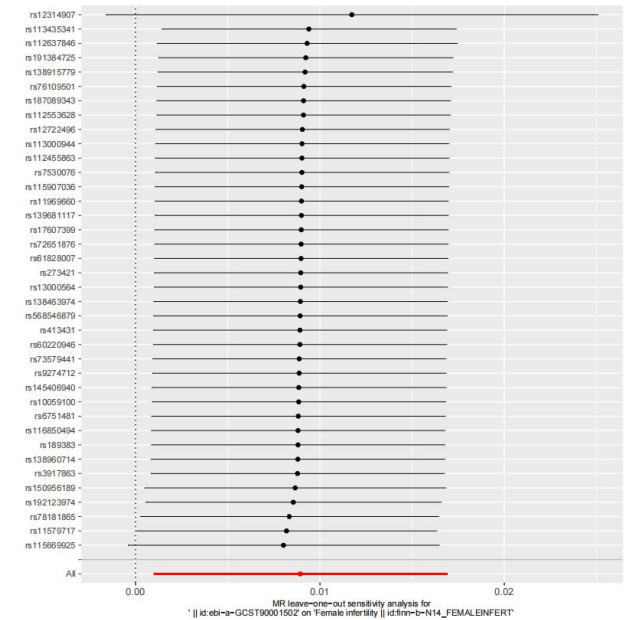

(F) Scatter plots, funnel plots, and sensitivity analyses of Activated & secreting Treg %CD4 Treg and female infertility risk

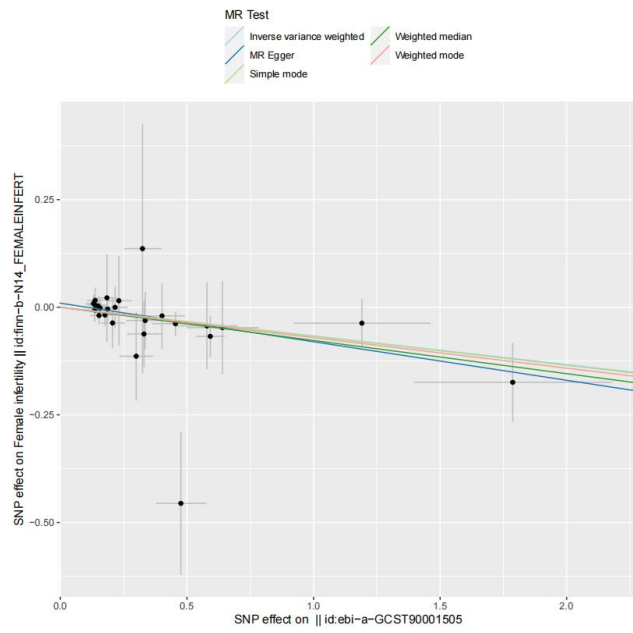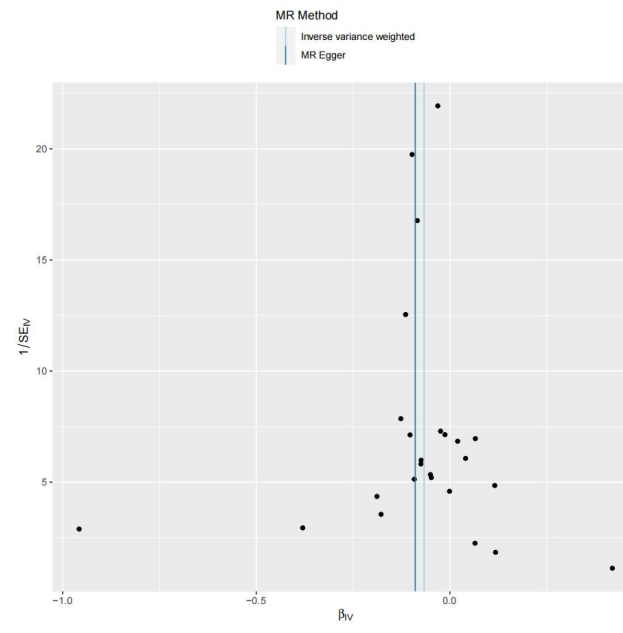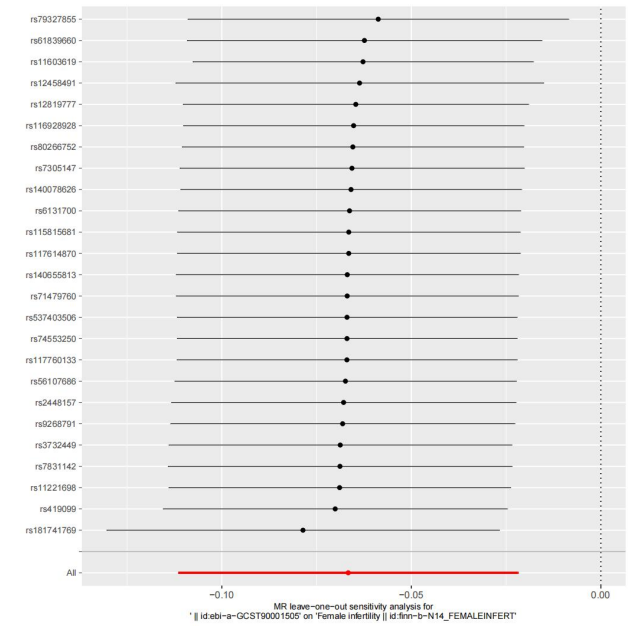

(G) Scatter plots, funnel plots, and sensitivity analyses of CD25hi %CD4+ and female infertility risk

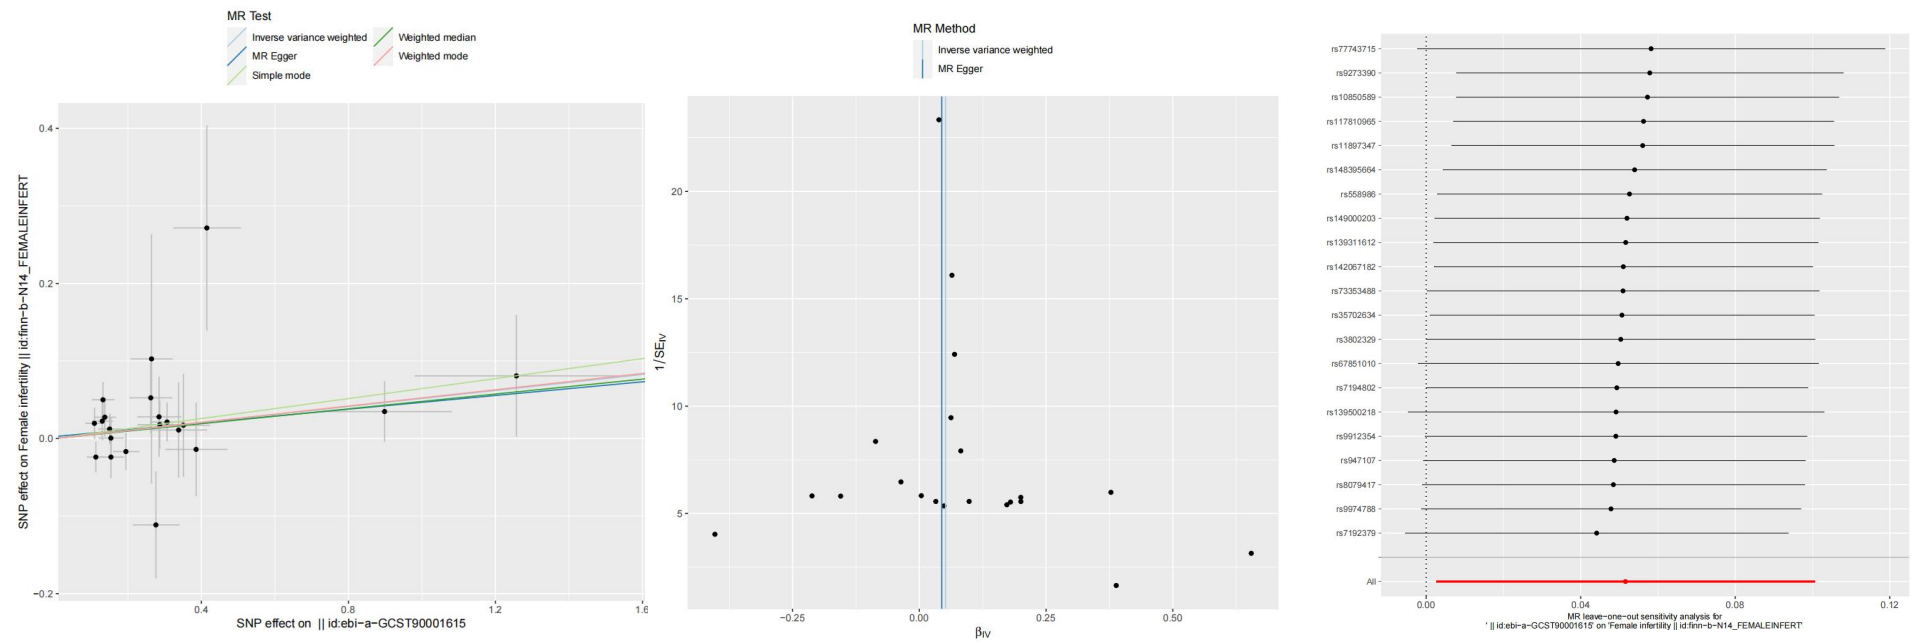

(H) Scatter plots, funnel plots, and sensitivity analyses of TCRgd AC and female infertility risk



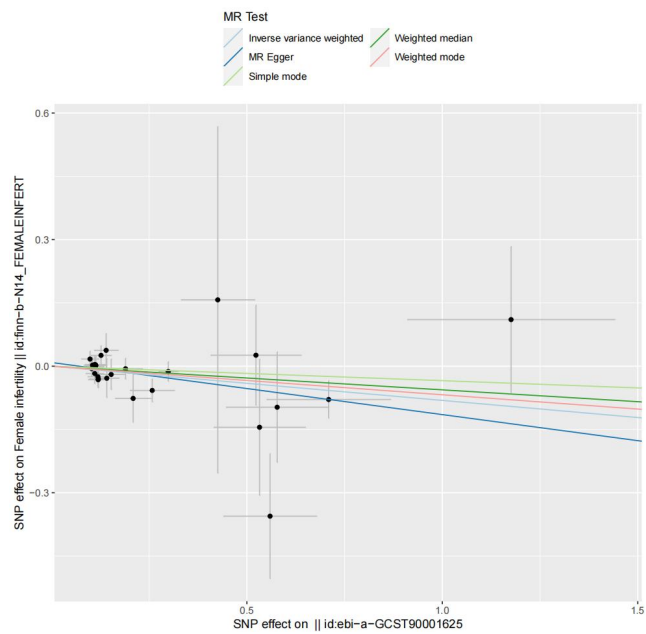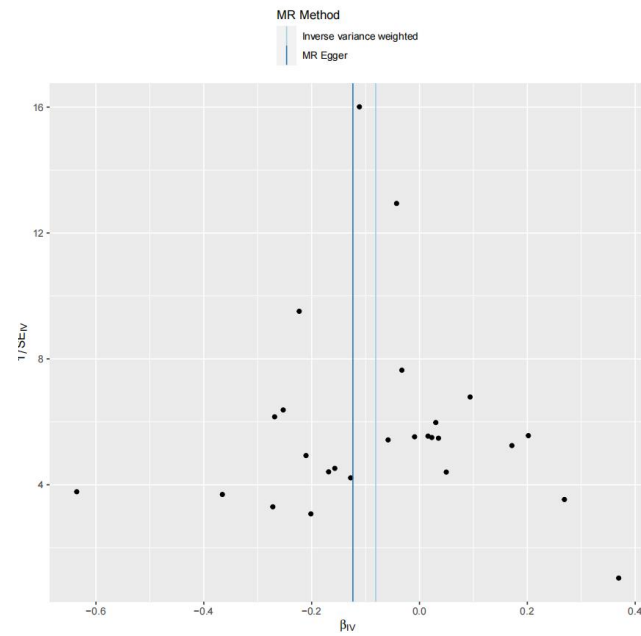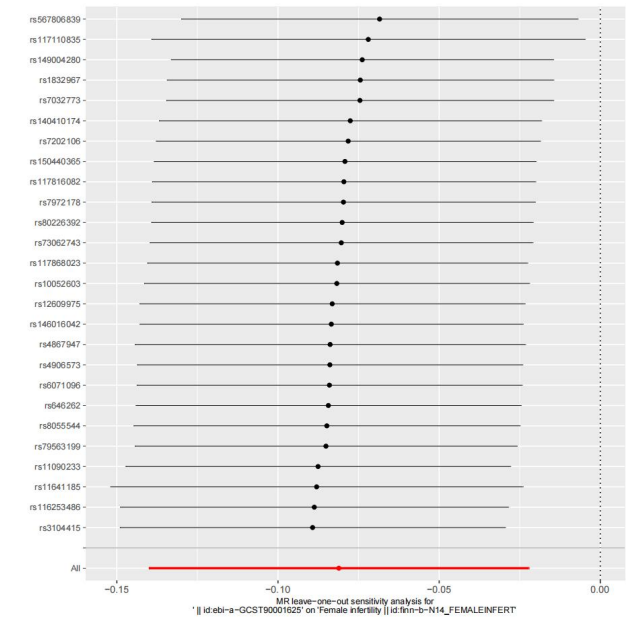

(I) Scatter plots, funnel plots, and sensitivity analyses of HLA DR+ CD4+ %T cell and female infertility risk

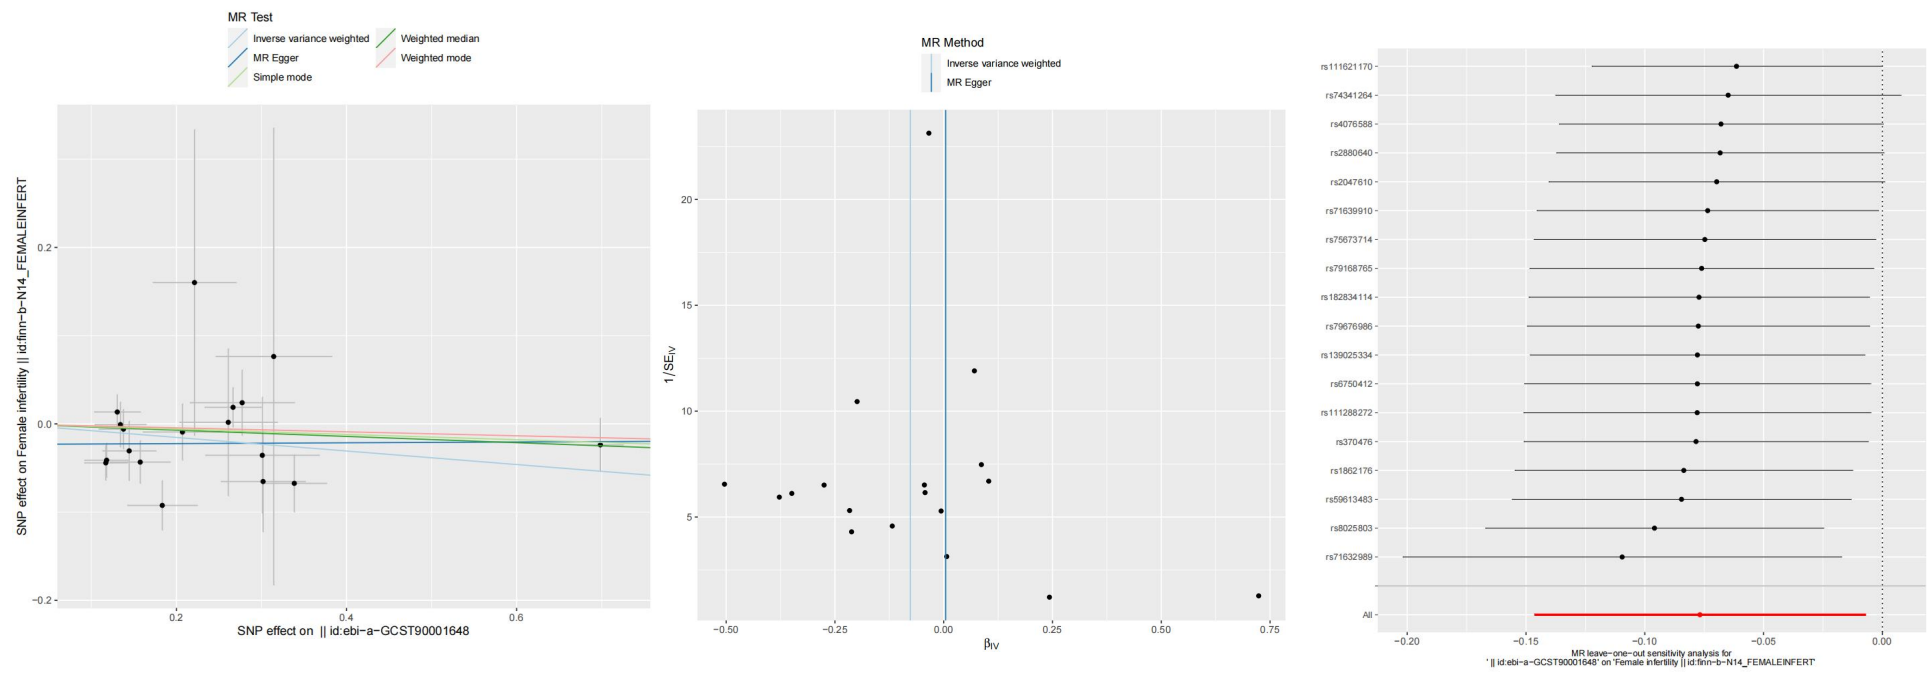

(J) Scatter plots, funnel plots, and sensitivity analyses of HLA DR+ NK AC and female infertility risk

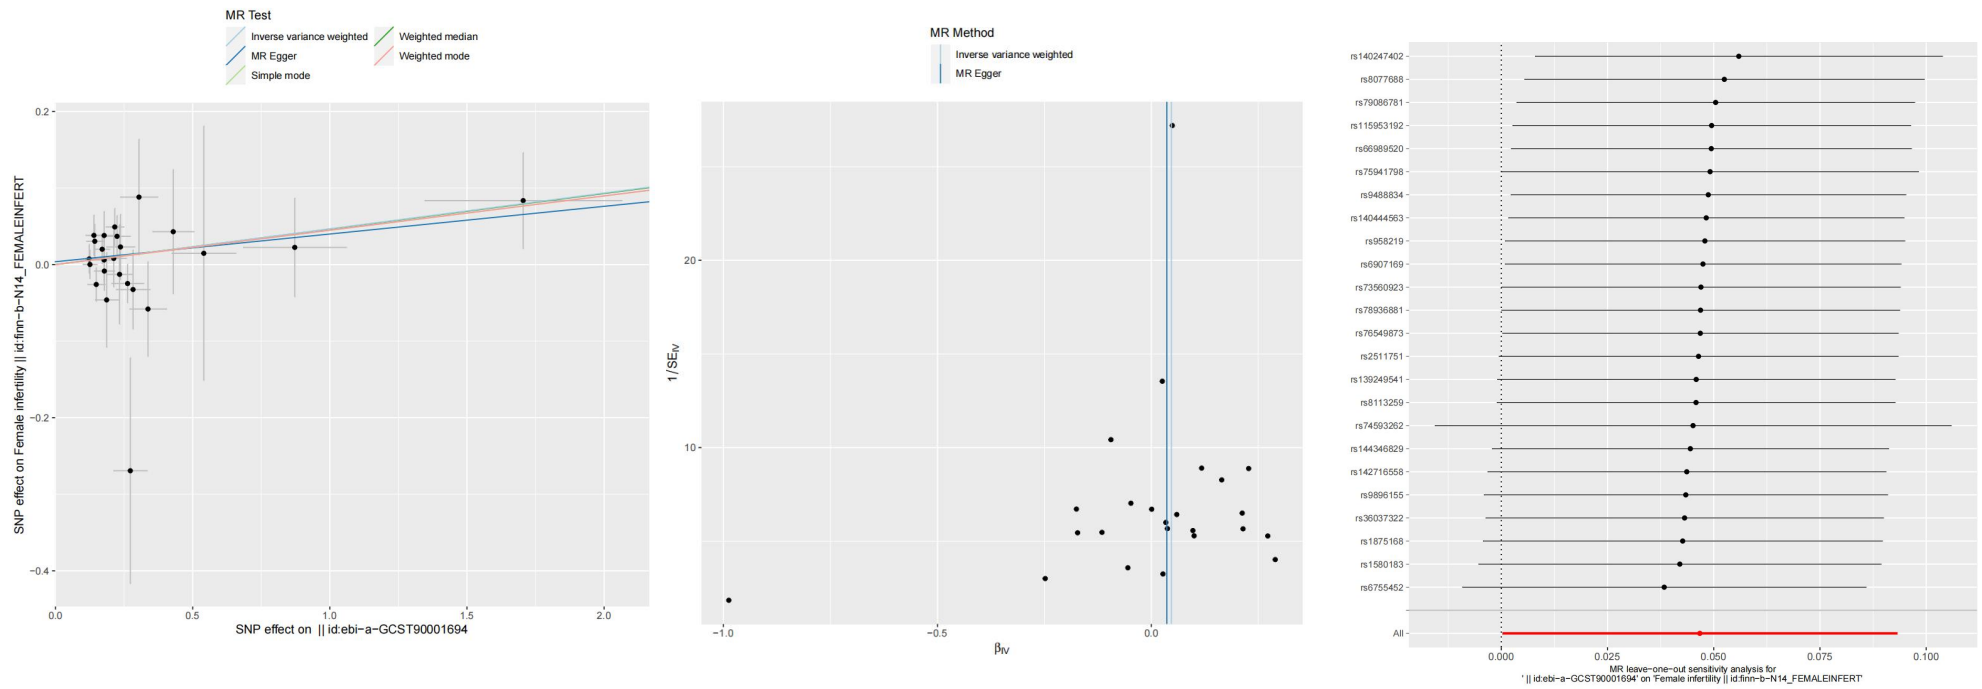

(K) Scatter plots, funnel plots, and sensitivity analyses of CD28- DN (CD4-CD8-) %T cell and female infertility risk

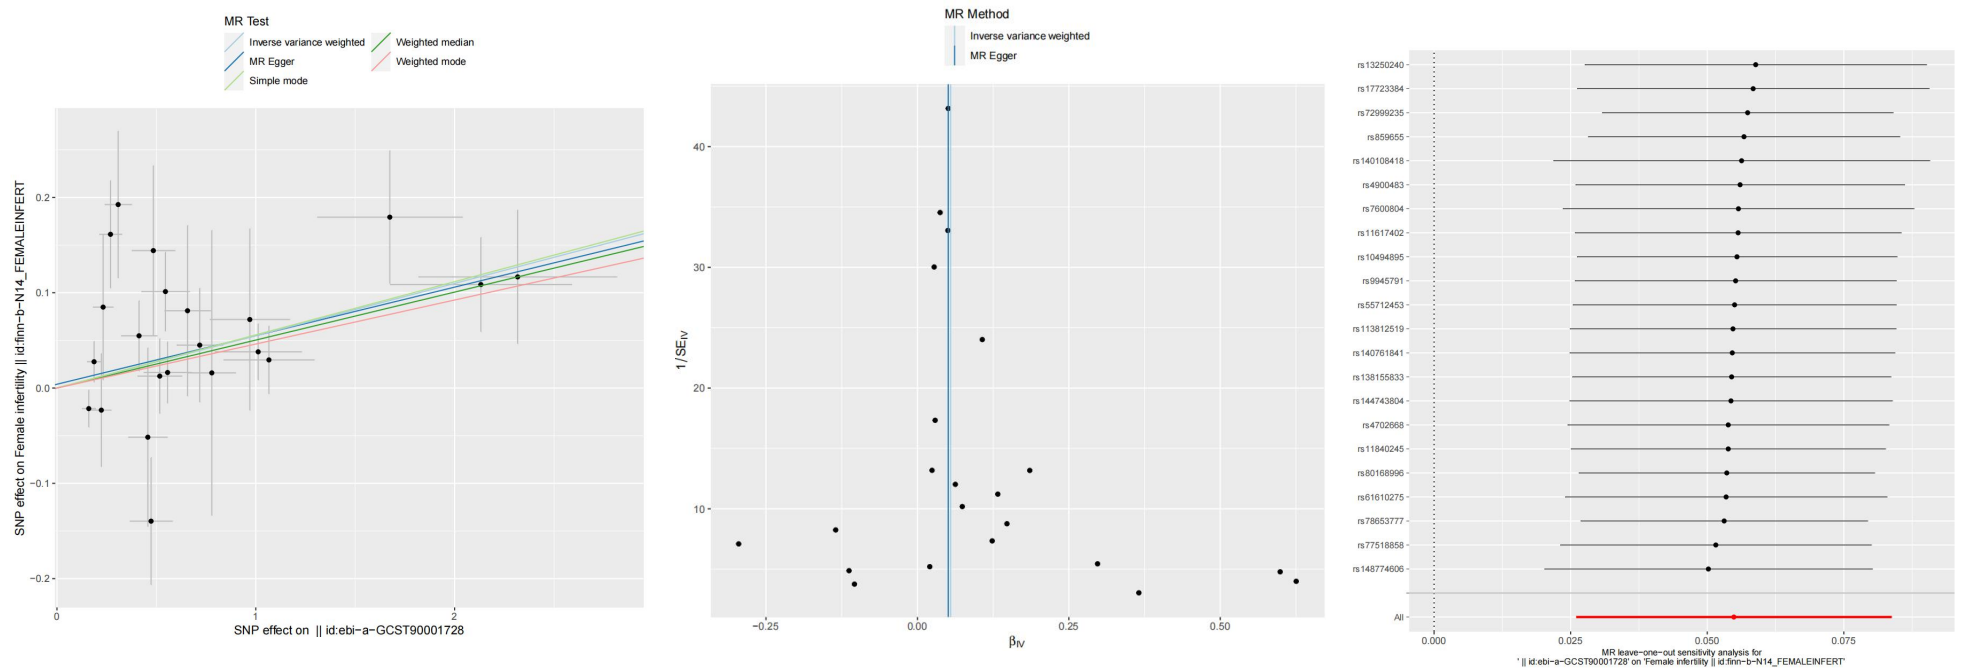

(L) Scatter plots, funnel plots, and sensitivity analyses of CD19 on IgD+ CD38- unsw mem and female infertility risk

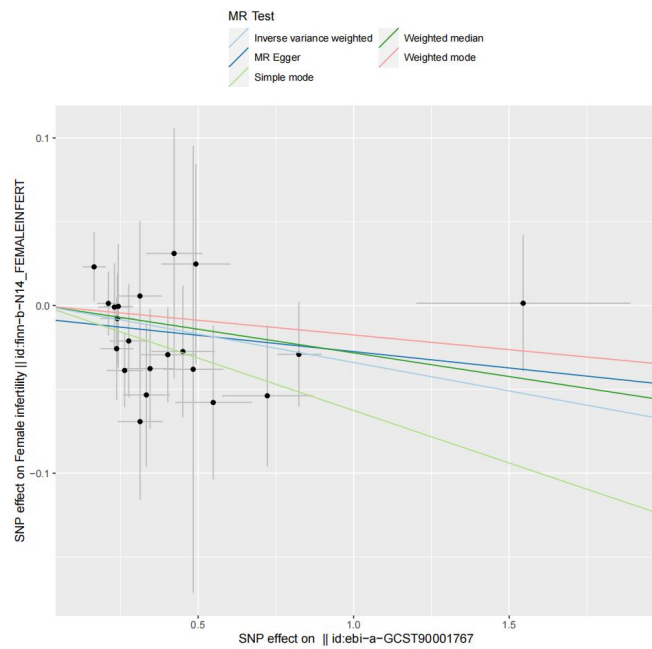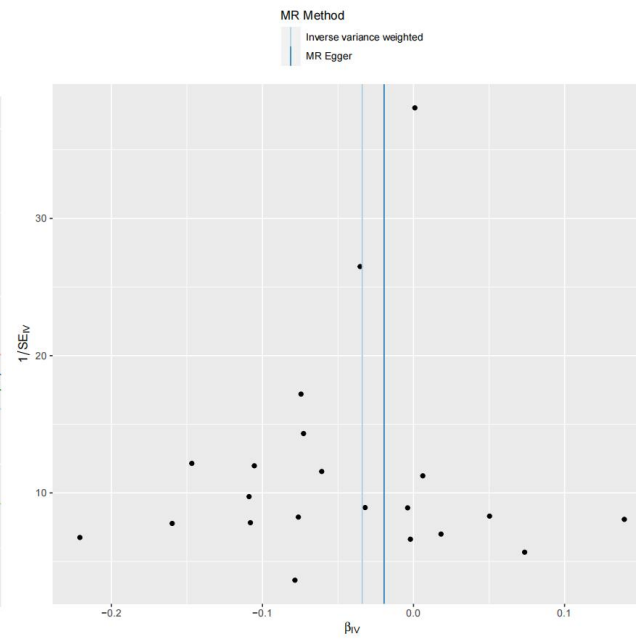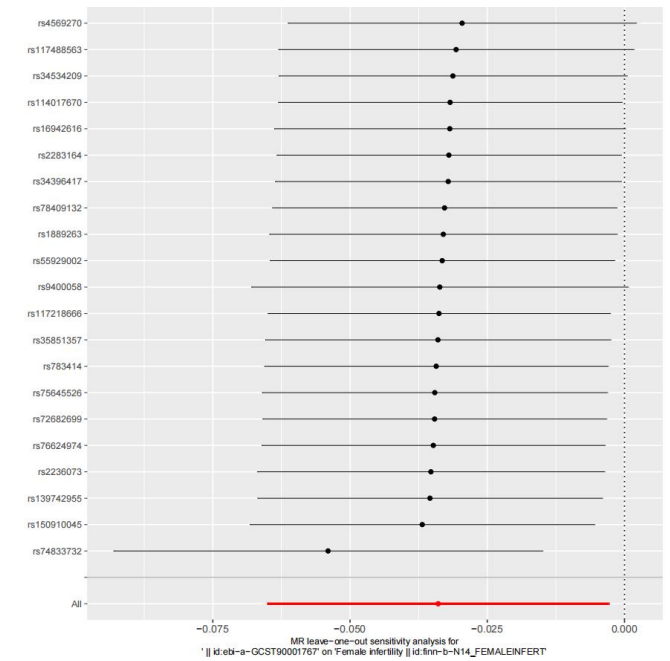

(M) Scatter plots, funnel plots, and sensitivity analyses of CD24 on IgD+ CD38- unsw mem and female infertility risk

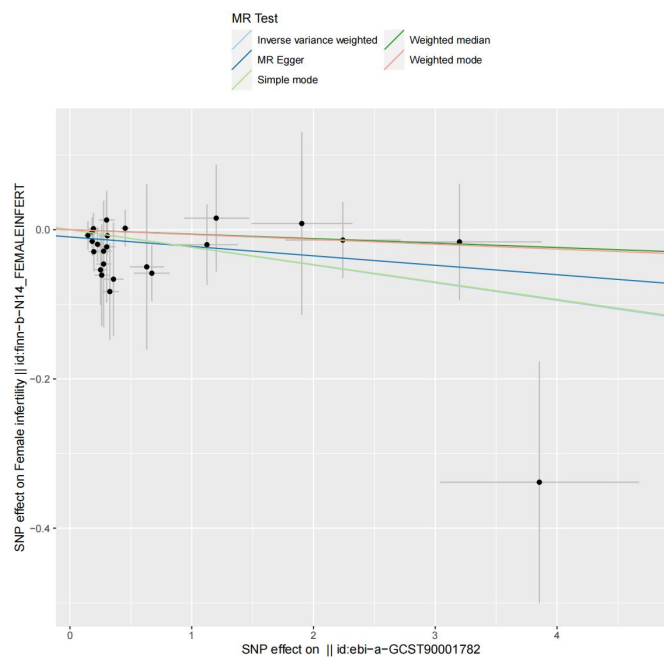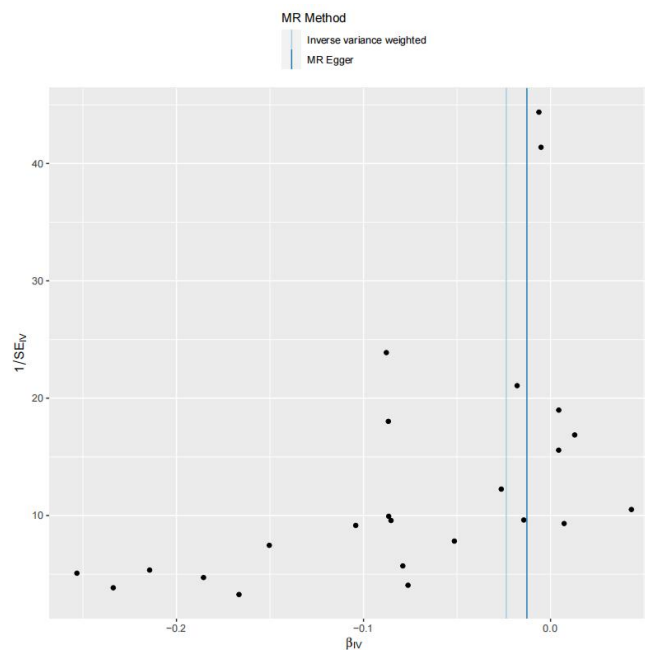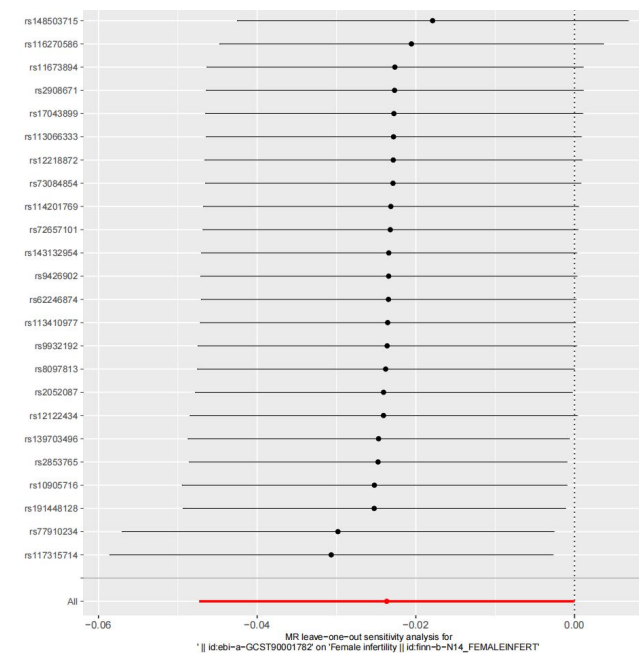

(N) Scatter plots, funnel plots, and sensitivity analyses of CD25 on IgD+ CD38- unsw mem and female infertility risk
